# Supplementary material for: Insecticidal Effect of Entomopathogenic Nematodes and the Cell-Free Supernatant from Their Symbiotic Bacteria against Philaenus spumarius (Hemiptera: Aphrophoridae) Nymphs
Source: MDPI journal article supplement (doi:10.3390/insects12050448), 2021-05-14
Supplement: s1 [file s1]

**Table S1.** Results from generalized linear mixed models testing within pair-treatment comparisons (treatment vs. controls) for the impact of entomopathogenic nematodes (EPNs) and cell-free supernatants (SM) of their symbiont bacteria (applied at two concentrations) on *P. spumarius* nymphs. Asterisks indicate significant differences at \*\*\* $P < 0.001$ , \*\* $P < 0.01$ , \* $P < 0.05$ , and n.s., not significant.

|                                                      |                                              | Day 3    |      | Day 4    |      | Day 5    |      |
|------------------------------------------------------|----------------------------------------------|----------|------|----------|------|----------|------|
| Pair-treatment comparison<br>(treatment vs. control) |                                              | $\chi^2$ | P    | $\chi^2$ | P    | $\chi^2$ | P    |
| EPNs                                                 | <i>S. feltiae</i>                            | 70,491   | ***  | 76,652   | ***  | 72,865   | ***  |
|                                                      | <i>S. carpocapsae</i>                        | 83,603   | ***  | 91,33    | ***  | 86,051   | ***  |
|                                                      | <i>S. riojaense</i>                          | 5,963    | *    | 18,398   | ***  | 30,077   | ***  |
|                                                      | <i>H. bacteriophora</i>                      | 0,012    | n.s. | 1,726    | n.s. | 0,299    | n.s. |
| SM 1 : 10                                            | <i>X. bovienii</i>                           | 1,063    | n.s. | 1,39     | n.s. | 2,78     | n.s. |
|                                                      | <i>X. nematophilus</i>                       | 11,988   | **   | 12,499   | ***  | 8,53     | **   |
|                                                      | <i>X. kozodoii</i>                           | 5,092    | *    | 6,284    | n.s. | 2,99     | n.s. |
|                                                      | <i>P. laumondii</i>                          | 6,581    | *    | 15,442   | ***  | 34,42    | ***  |
|                                                      | <i>X. nematophilus</i> + <i>X. bovienii</i>  | 7,233    | **   | 8,581    | **   | 10,99    | ***  |
|                                                      | <i>X. nematophilus</i> + <i>P. laumondii</i> | 10,128   | **   | 15,088   | ***  | 27,19    | ***  |
| SM 1 : 6.67                                          | <i>X. bovienii</i>                           | 1,265    | n.s. | 0,496    | n.s. | 0,46     | n.s. |
|                                                      | <i>X. nematophilus</i>                       | 0,462    | n.s. | 1,923    | n.s. | 0,787    | n.s. |
|                                                      | <i>X. kozodoii</i>                           | 0,459    | n.s. | 0,086    | n.s. | 0,017    | n.s. |
|                                                      | <i>P. laumondii</i>                          | 0,459    | n.s. | 2,685    | n.s. | 1,886    | n.s. |
